# Supplementary material
Source: publisher figshare collection journal article supplement (https://frontiersin.figshare.com/ndownloader/files/10609126)
Supplement: Supplementary file [file 10609126]

## Supplementary Material

### Proanthocyanidin synthesis in Chinese bayberry (*Myrica rubra* Sieb. et Zucc.) fruits

Liyu Shi <sup>1</sup>, Shifeng Cao <sup>2</sup>, Xin Chen <sup>2</sup>, Wei Chen <sup>2</sup>, Yonghua Zheng <sup>1,\*</sup>,  
and Zhenfeng Yang <sup>2,\*</sup>

\* Correspondence: zhengyh@njau.edu.cn & yangzf@zww.edu.cn

```
MrLAR : MTVTP-----ISAGKGRVLIIVGATGFIGQFIAEASIAAGRT : 37
VvLAR : MTVSP-----VSPKGRVLIAGATGFIGQFVAEASIDAHRT : 37
CsLAR : MTVLES-----VSAAGGGVLIIVGASGFIGQFIAEASIHADRT : 38
TcLAR : MRIKGSRRPMDQSLTRGSRLKLLKPERPPSMTASTANGRVLIIVGATGFIGQFVAEASIDAGRT : 65
MtLAR : MAPSSSP-----TTPISKGRVLIIVGATGFMGKFVTEASISTAHT : 40

MrLAR : YVLVREGPGGFSKAKNVKALQDKGAILHGLIKDKQFVEKILKREIDIVISAVGGENILDQINL : 102
VvLAR : YVILAREGPRSPSKANIFKALIEDKGAIIVYGLINEQAMEKILKEHIDIVVSTVGGESILDQIAL : 102
CsLAR : YLLVRSVG---SKTN---KTLQDKGAKVIHGVVKDQAFMEKILKEHKIDIVISAIGGANILDQIAL : 98
TcLAR : YVLVRESS---KNKVKALQDRGATVLEGLAHEKESMEKLLKEHCIEIVISAVGGEEKILDQLSL : 126
MtLAR : YLLIIRGGLISSKAATIKTFCEKGAIIVYGVVNNKEFVEMILKKYEIDTVISAGAESILDQIAL : 105

MrLAR : IDAIKTVGTVKRFLPSEFGHDVDRADPVEPGLNMYRTKRRVRRLVESGIPFTYICCNSTIASWPY : 167
VvLAR : VKAMKAVGTIKRFLPSEFGHDVNRADPVEPGLNMYREKRRVRQLVEESGIPFTYICCNSTIASWPY : 167
CsLAR : VHAIKAVGTIKRFLPSEFGHDVDRADPVEPGLTMYNEKRRVRRLEECGVPTYICCNSTIASWPY : 163
TcLAR : IEAIIKAGTVKRFLPSEFGHDVDRADPVEPGLTMYKEKREVRVIEKLAIPTYICCNSTIASWPY : 191
MtLAR : VEAMKSIKTIKRFLPSEFGHDVDRADPVEPGLAMYKRLVRRVIESGVPTYICCNSTIASWPY : 170

MrLAR : YDNTHPSEVVPPLDYEFCIYGDGSKAYFVAGTDIGKFTIKTLDDIRTINKSVHFRFTCNLYNMNE : 232
VvLAR : YNNIHPSEVLPPTDYEFCIYGDGSKAYFVAGTDIGKFTIKTVDDIRTINKSVHFRFTSCNCLNINE : 232
CsLAR : YDNTHPSEVVPPLDYEFCIYGDGSKAYFVAGSDIGKFTIKTVDDIRTINKSVHFRFTSCNCLNINE : 228
TcLAR : YDNRHPSEVVPPLDYEFCIYGDGSKAYFVAGTDIGKFTIKTVDDIRTINKSVHFRFTSCNCLNINE : 256
MtLAR : YDNCPSQLEPPLDQLHYGHGSKAYFVAGTDIGKFTIKTVDDIRTINKSVHFRFTSCNCLNINE : 235

MrLAR : LASLWEKKICKTLPRVTVEEDLLAAAPNCIPQSVASETHDIFIKGCQNFETIDGPDVEVST : 297
VvLAR : LASVWEKKIGRTLPRVTVEEDLLAAAGENIIPQSVAAETHDIFIKGCQNFESIDGPDVEVTT : 297
CsLAR : LASLWEKKIGRTLPRVTVEEDLLAAAPVNIIPQSVASETHDIFIKGCQNFESIDGPDVEVCS : 293
TcLAR : LATLWEKKIGRTLPRVTVEEDLLSAPENCIPQSVASETHDIFIKGCQNFESIDGQNEIEVSS : 321
MtLAR : LASLWENKIAKIPRAIVSEEDLLGIAAPENCIPQSVASETHDIFIKGCQNFETIDGPDVEIST : 300

MrLAR : LYPDEAFRTLDECFDDYIVKIDGPKMTGDVASPSVAEPMKTGEVAAPSPVAEPMETATCA : 360
VvLAR : LYPEDSFRTVEECFGEYIVKIEEK-----QPTADSAIANTGPVVGMQRQVTATCA : 346
CsLAR : LYPEDSFRTVDECFDDFVVMNGK-----NFTDETGTGNTAQNHVVEVLEIT-MCA : 342
TcLAR : LYPNEFRLLDDCFNDFLVKMKDE-----NIKQSNEIPATKEVVEALAITATCA : 370
MtLAR : LYPGESFRSLEDCEFEVAMAADR-----IHKGENGVGTGGTKALVEPVEITATCA : 349
```

**Figure S2 Alignment of deduced amino acid sequences of LAR genes.** Sequences are from *Morella rubra* (Mr; AIX02997.1), *Vitis vinifera* (Vv; NP\_001267887.1), *Camellia sinensis* (Cs; AHJ11241.1), *Theobroma cacao* (Tc; XP\_007046315) and *Medicago truncatula* (Mt; XP\_003591830). Identical amino acids are indicated by a black background, conservative amino acids by a dark gray background, and similar amino acids by a light gray background. LAR characteristic amino acid motifs RFLP, ICCN, and THD motifs are boxed.
